# Supplementary material
Source: PubMed Central journal article supplement (PMC10244315)
Supplement: 13205_2023_3632_MOESM1_ESM.pdf [file 13205_2023_3632_MOESM1_ESM.pdf]

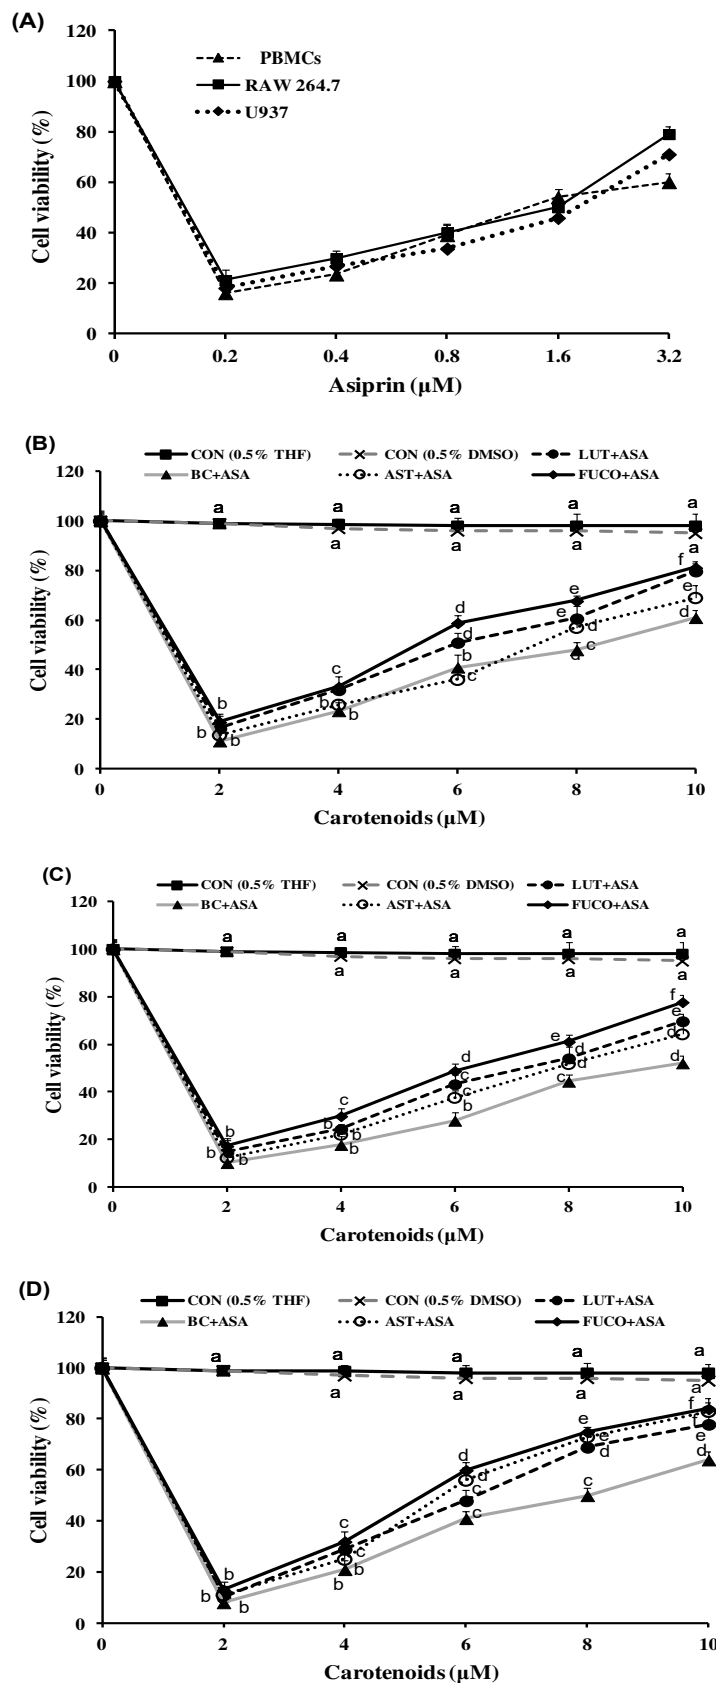

**Supplementary Figure 1.** Effect of ASA and its combination with different carotenoids on cell viability of macrophages (A-C) and PBMCs (D) incubated for 12 h. The data represent mean  $\pm$  SD ( $n = 5$ ). <sup>a,b,c,d,e,f</sup> Values not sharing a common superscript letter between the treatments are significantly different ( $p < 0.05$ ) from their respective control as analyzed by one-way ANOVA followed by Tukey's test. CON, control; LPS, lipopolysaccharide; ASA, aspirin; BC,  $\beta$ -carotene; LUT, lutein; AST, Astaxanthin; FUCO, Fucoxanthin. Control (CON) represents a treatment of THF or DMSO vehicle alone. Refer to Table 1 for abbreviations and treatment doses.
